# Supplementary material for: Improved GRFS after posttransplant cyclophosphamide-based vs ATG-based HLA-mismatched unrelated donor transplant
Source: PubMed Central journal article supplement — Blood Adv. 2022 Jun 27;6(15):4491–500. doi: 10.1182/bloodadvances.2022007596 (PMC9636312; doi:10.1182/bloodadvances.2022007596), 2022-06-27
Supplement: mmc1.pdf [file mmc1.pdf]

**DATA SUPPLEMENT****Supplemental Table 1: Univariate Hazard Ratios for GRFS**

| <b>Variable</b>                 | <b>HR</b> | <b>95% CI</b> | <b>P value</b> |
|---------------------------------|-----------|---------------|----------------|
| <b>GVHD prophylaxis group</b>   |           |               |                |
| ATG                             | Reference |               | <0.001         |
| PTCy                            | 0.33      | 0.21 - 0.53   |                |
| <b>Age</b>                      | 1.00      | 0.99 - 1.02   | 0.7            |
| <b>Recipient CMV serostatus</b> |           |               |                |
| Negative                        | Reference |               | 0.4            |
| Positive                        | 1.24      | 0.72 - 2.13   |                |
| <b>CIBMTR Risk</b>              |           |               |                |
| High                            | Reference |               | 0.013          |
| Intermediate                    | 0.51      | 0.30 - 0.86   |                |
| Low                             | 0.47      | 0.27 - 0.81   |                |
| <b>HCT-CI (Continuous)</b>      | 0.95      | 0.85 - 1.06   | 0.3            |
| <b>Graft source</b>             |           |               |                |
| BM                              | Reference |               | 0.05           |
| PB                              | 1.58      | 1.00 - 2.47   |                |
| <b>HLA-DQB1 matched donor</b>   | 0.7       | 0.40 - 1.13   | 0.1            |

**Supplemental Figure 1:**

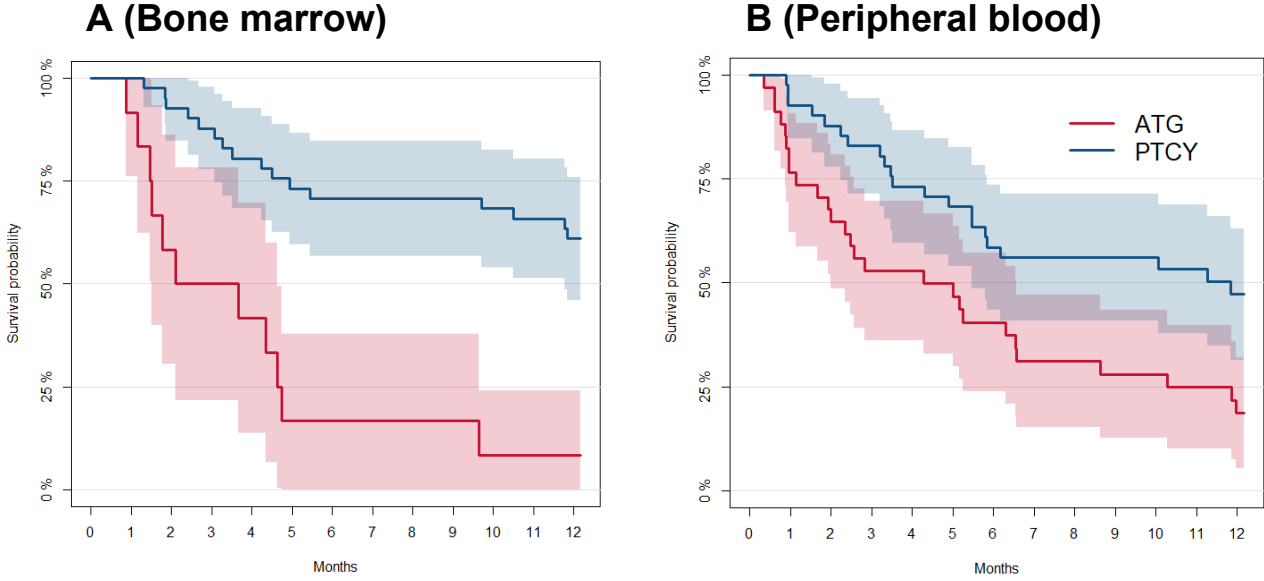

**Supplemental figure 1: GRFS in subjects treated with bone-marrow derived grafts (A) and peripheral blood derived grafts (B).**

**Supplemental Figure 2:**

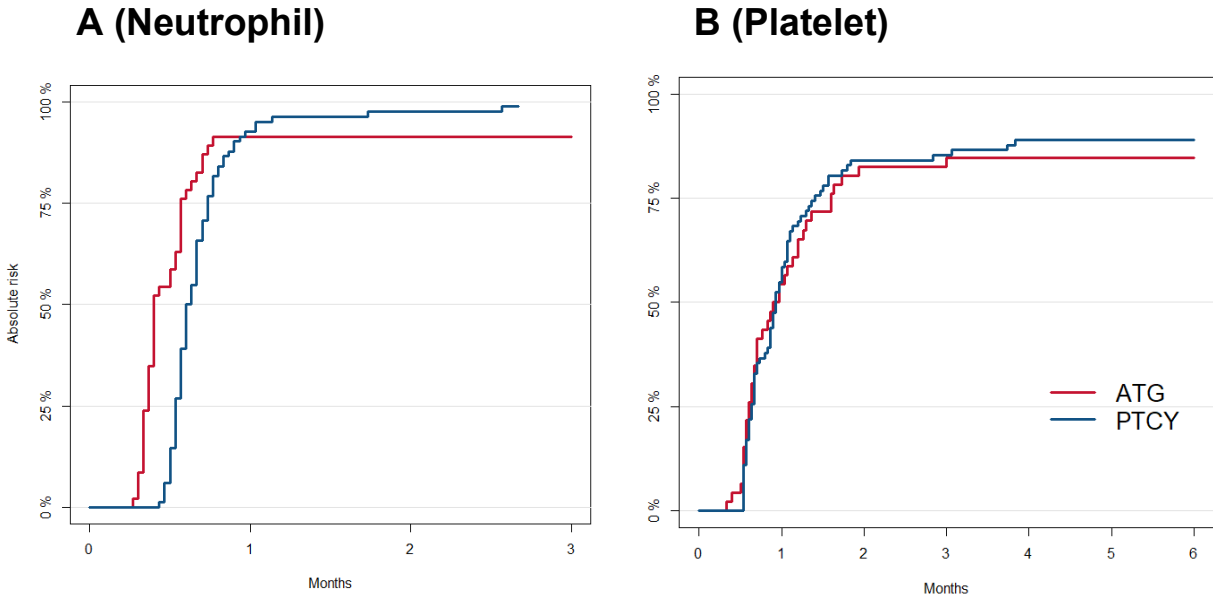

**Supplementary figure 2: (A) Cumulative incidence of primary neutrophil engraftment and (B) cumulative incidence of primary platelet engraftment in subjects treated with ATG (red) or PTCy (blue).**

**Supplemental Figure 3: Day 100 Percent Donor STR Chimerism by Group. Median and interquartile ranges are shown.**

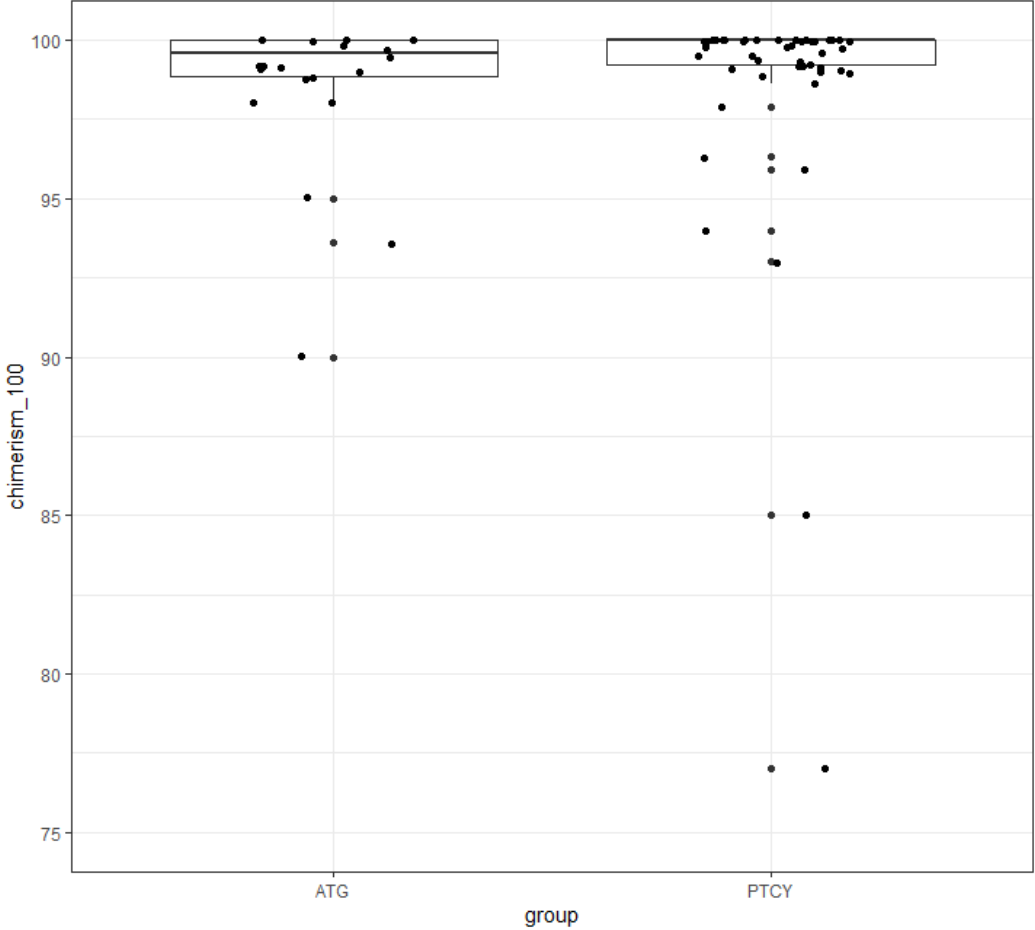

Supplementary Figure 4:

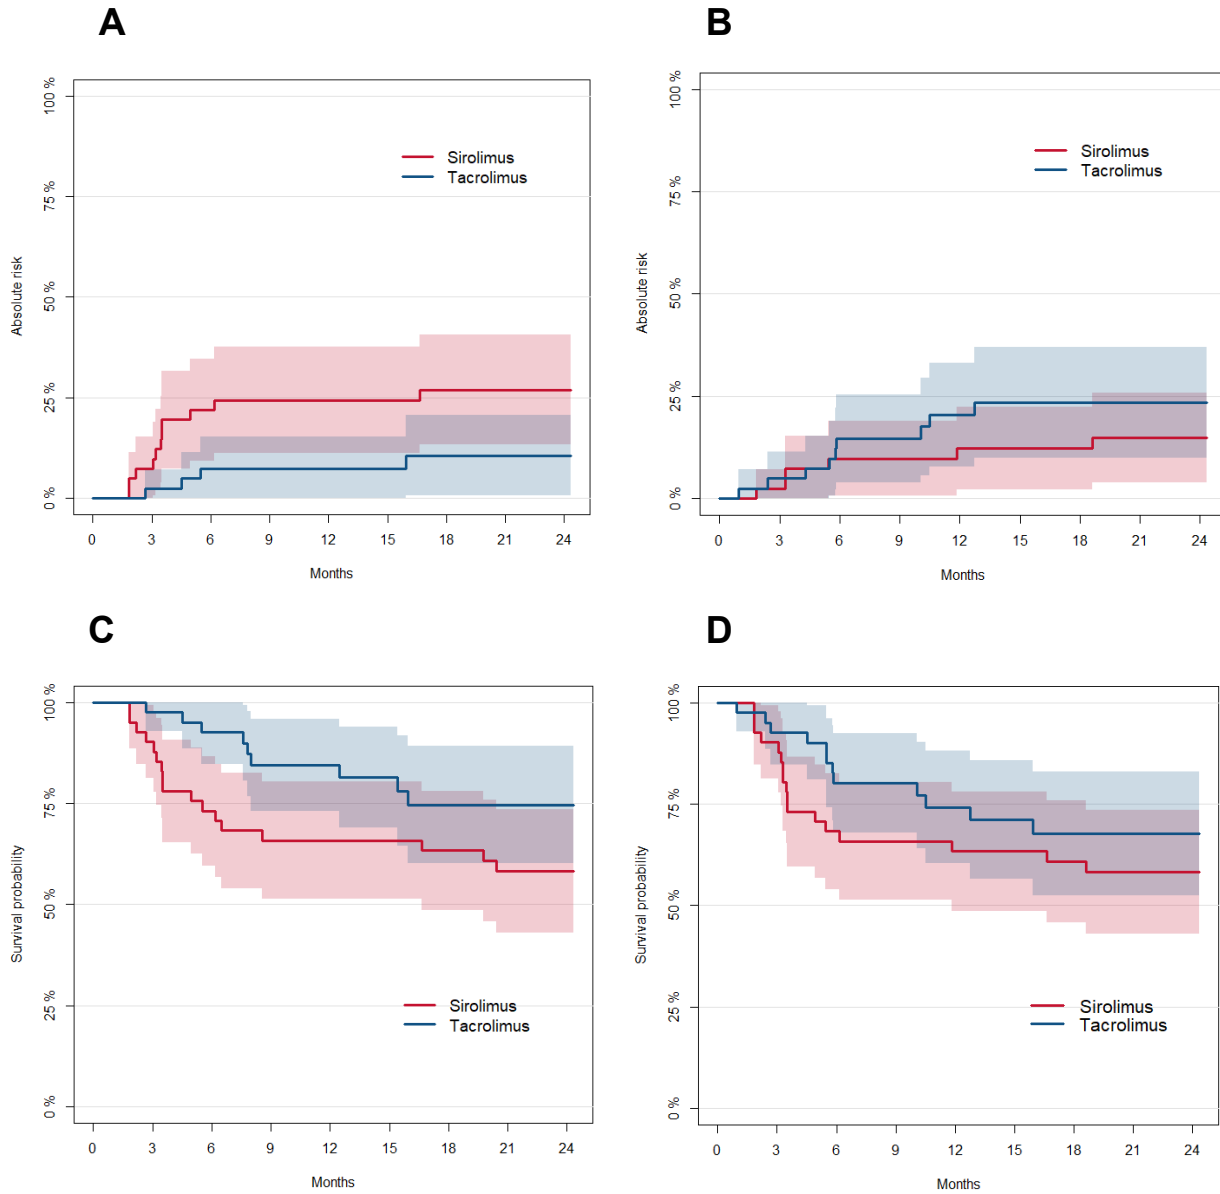

**Outcomes in patients treated with PTCy with either sirolimus or tacrolimus. (A) Cumulative incidence of NRM, (B) Cumulative incidence of relapse, (C) Overall survival, (D) Event-free survival**

Supplementary Figure 5:

**A (CMV)**

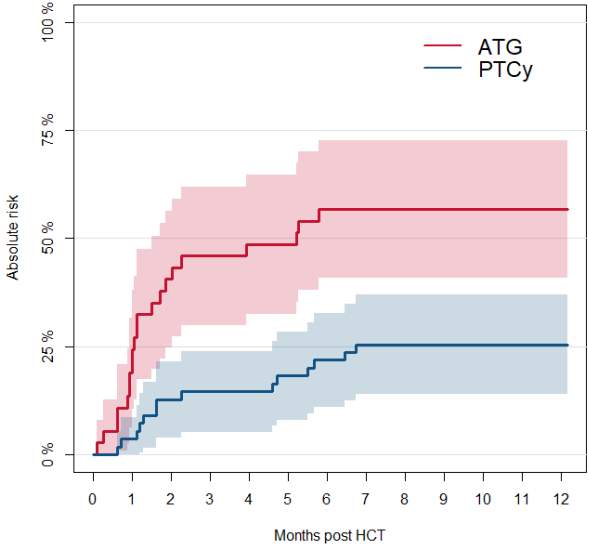

**B (EBV)**

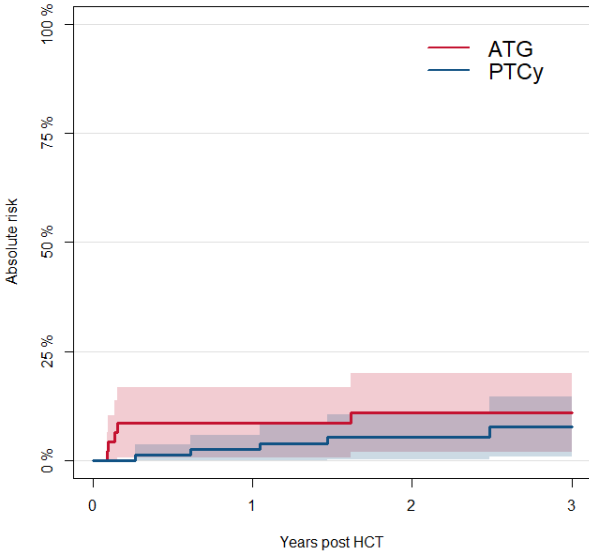

Supplementary figure 5: Cumulative incidence of clinically significant CMV infection in seropositive recipients (A) and EBV infection including the entire cohort (B)
